# Supplementary material
Source: Springer Nature journal article supplement (https://www.springerprofessional.de/resource/supplementary/13638_2011_191_MOESM2_ESM.pdf/11897134)

- Node parameters (e.g., position and address)
- Microcontroller parameters (e.g., clock frequency and voltage)
- RF Transceiver parameters (e.g., TX power and RX sensitivity)
- Peripheral parameters (e.g., battery discharge rate and sensor data source)
- Protocol parameters (e.g., MAC algorithm parameters)
- Network parameters (e.g., PER and attenuation index )
- Application parameters (e.g., duty cycle and number of nodes)

Input XML file

**IDEA1**

Output Log file

GUI visualization

VCD file

Debug Information  
Simulation results, e.g.,  
Energy consumption  
Packet delivery rate  
Packet delivery latency

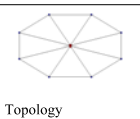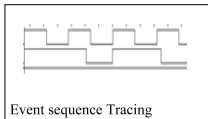

Supplement: MOESM2 [file 11897134]
